# Supplementary material
Source: PubMed Central journal article supplement (PMC6898757)
Supplement: NIHMS1060523-supplement-Supplement.pdf [file NIHMS1060523-supplement-Supplement.pdf]

**Online Resource 1.** Inclusion and exclusion criteria

| Inclusion                   |                                                                                                                                                                                                 |
|-----------------------------|-------------------------------------------------------------------------------------------------------------------------------------------------------------------------------------------------|
| Patient and disease related | Histological or cytological confirmation of unresectable measurable malignant pleural mesothelioma for which no prior systemic therapy was administered or after recurrence after local therapy |
|                             | Measurable lesions according to Response Evaluation Criteria in Solid Tumors (RECIST) version 1.1.                                                                                              |
|                             | 18 years and older                                                                                                                                                                              |
|                             | Archival material available                                                                                                                                                                     |
|                             | Eastern Cooperative Oncology Group (ECOG) Performance Status 0-2                                                                                                                                |
| Hematologic values          | hemoglobin $\geq 10$ g/dL, neutrophils $\geq 1.5 \times 10^9/L$ , platelets $\geq 100 \times 10^9/L$ , partial thromboplastin time $\leq 1.25 \times$ upper limit of normal (ULN)),             |
| Hepatic function            | albumin $\geq 2.5$ g/dL, total bilirubin $\leq 1.25 \times$ ULN , aspartate aminotransferase (AST)/alanine aminotransferase (ALT) $\leq 2.5 \times$ ULN                                         |
| Renal function              | serum creatinine $\leq 1.5 \times$ ULN or creatinine clearance $\geq 45$ mL/min                                                                                                                 |
| Cardiac function            | Left ventricular ejection fraction $\geq$ lower limit of normal by echocardiography                                                                                                             |
| Exclusion                   |                                                                                                                                                                                                 |
|                             | Previous treatment with any FGFR inhibitor<br>Any biological therapy within six weeks prior to the first dose of GSK3052230                                                                     |
|                             | Any unresolved toxicity from anticancer therapy $\geq$ grade 2, except alopecia, active malignancy, symptomatic leptomeningeal or brain metastases                                              |
|                             | Uncontrolled infections, prior trauma or surgery within 28 days before the first dose of study drug, cardiac abnormalities, human immunodeficiency positivity                                   |
|                             | Conditions likely to increase the potential for abdominal perforation or fistula formation such as ulcers, pelvic radiation or intra-abdominal abscesses in the recent history.                 |

**Online Resource 2.** Study-specified DLT definitions. DLTs defined as toxicities occurring within the first 21 days of period on study and at least possibly related to GSK3052230 alone or in combination with pemetrexed/cisplatin.

| <b>Toxicity</b> | <b>Definition</b>                                                                                                                                                                                                                                                                                                                                                                                                                                                                                                                                                                                                                                                                                                                                                                                                                                   |
|-----------------|-----------------------------------------------------------------------------------------------------------------------------------------------------------------------------------------------------------------------------------------------------------------------------------------------------------------------------------------------------------------------------------------------------------------------------------------------------------------------------------------------------------------------------------------------------------------------------------------------------------------------------------------------------------------------------------------------------------------------------------------------------------------------------------------------------------------------------------------------------|
| Hematologic     | <ul style="list-style-type: none"> <li>• Grade 4 neutropenia for more than 7 days</li> <li>• Grade 4 febrile neutropenia</li> <li>• Grade 4 thrombocytopenia</li> </ul>                                                                                                                                                                                                                                                                                                                                                                                                                                                                                                                                                                                                                                                                             |
| Non-hematologic | <ul style="list-style-type: none"> <li>• Grade 4 clinically significant laboratory abnormalities with duration greater than 48 hours</li> <li>• Grade 3 or greater clinically significant non-hematologic toxicity, with the following exceptions:               <ul style="list-style-type: none"> <li>○ Grade 3 nausea/vomiting or diarrhea that responds to optimal medical care within 3 days</li> <li>○ Grade 3 infusion reactions that can be medically managed without the use of systemic antihypotensives and allow completion of infusion</li> </ul> </li> <li>• Any grade 2 toxicity occurring within or beyond the 21-day period which in the judgment of the investigator and GSK medical monitor is considered a DLT</li> <li>• Treatment delay of <math>\geq 14</math> days due to unresolved study drug-related toxicity</li> </ul> |

**Online Resource 3.** FGF2 protein expression in FFPE mesothelioma specimens by IHC

| Subject Number | Cytoplasmic Staining |    |     |     |         | Nuclear Staining |    |    |     |         |
|----------------|----------------------|----|-----|-----|---------|------------------|----|----|-----|---------|
|                | 3+                   | 2+ | 1+  | 0   | H-score | 3+               | 2+ | 1+ | 0   | H-score |
| 1302           | 0                    | 0  | 70  | 30  | 70      | 0                | 0  | 5  | 95  | 5       |
| 1614           | 0                    | 70 | 20  | 10  | 160     | 10               | 5  | 10 | 75  | 50      |
| 2203           | 0                    | 50 | 50  | 0   | 150     | 15               | 15 | 20 | 50  | 95      |
| 2211           | 0                    | 0  | 20  | 80  | 20      | 70               | 10 | 10 | 10  | 240     |
| 2213           | 0                    | 0  | 10  | 90  | 10      | 0                | 0  | 10 | 90  | 10      |
| 2402           | 0                    | 20 | 60  | 20  | 100     | 10               | 10 | 5  | 75  | 55      |
| 2601           | 0                    | 0  | 50  | 50  | 50      | 10               | 15 | 25 | 50  | 85      |
| 2801           | 0                    | 60 | 40  | 0   | 160     | 10               | 15 | 15 | 60  | 75      |
| 3006           | 0                    | 25 | 75  | 0   | 125     | 2                | 3  | 3  | 92  | 15      |
| 3009           | 0                    | 0  | 70  | 30  | 70      | 0                | 0  | 0  | 100 | 0       |
| 3011           | 0                    | 40 | 50  | 10  | 130     | 5                | 5  | 15 | 75  | 40      |
| 3012           | 0                    | 0  | 50  | 50  | 50      | 0                | 0  | 0  | 100 | 0       |
| 3014           | 0                    | 50 | 50  | 0   | 150     | 0                | 10 | 20 | 70  | 40      |
| 3016           | 0                    | 25 | 65  | 10  | 115     | 5                | 5  | 20 | 70  | 45      |
| 3019           | 0                    | 60 | 40  | 0   | 160     | 25               | 10 | 10 | 55  | 105     |
| 3100           | 0                    | 20 | 70  | 10  | 110     | 5                | 3  | 2  | 90  | 23      |
| 3300           | 0                    | 0  | 0   | 100 | 0       | 5                | 5  | 15 | 75  | 40      |
| 3302           | 0                    | 0  | 80  | 20  | 80      | 10               | 20 | 50 | 20  | 120     |
| 3406           | 0                    | 20 | 80  | 0   | 120     | 0                | 2  | 2  | 96  | 6       |
| 3408           | 0                    | 50 | 50  | 0   | 150     | 0                | 0  | 2  | 98  | 2       |
| 3411           | 0                    | 40 | 40  | 20  | 120     | 40               | 30 | 20 | 10  | 200     |
| 3413           | 0                    | 0  | 60  | 40  | 60      | 0                | 0  | 0  | 100 | 0       |
| 3414           | 0                    | 0  | 70  | 30  | 70      | 2                | 2  | 6  | 90  | 16      |
| 3415           | 0                    | 0  | 100 | 0   | 100     | 20               | 50 | 20 | 10  | 180     |
| 4263           | 0                    | 30 | 50  | 20  | 110     | 0                | 0  | 0  | 100 | 0       |
| 4300           | 0                    | 50 | 50  | 0   | 150     | 30               | 10 | 10 | 50  | 120     |
| 4500           | 0                    | 60 | 35  | 5   | 155     | 50               | 20 | 20 | 10  | 210     |

Note: H-score calculated as:  $H\text{-score} = (\text{Percentage of 0 scoring} \times 0) + (\text{Percentage of 1+ scoring} \times 1) + (\text{Percentage of 2+ scoring} \times 2) + (\text{Percentage of 3+ scoring} \times 3)$ .

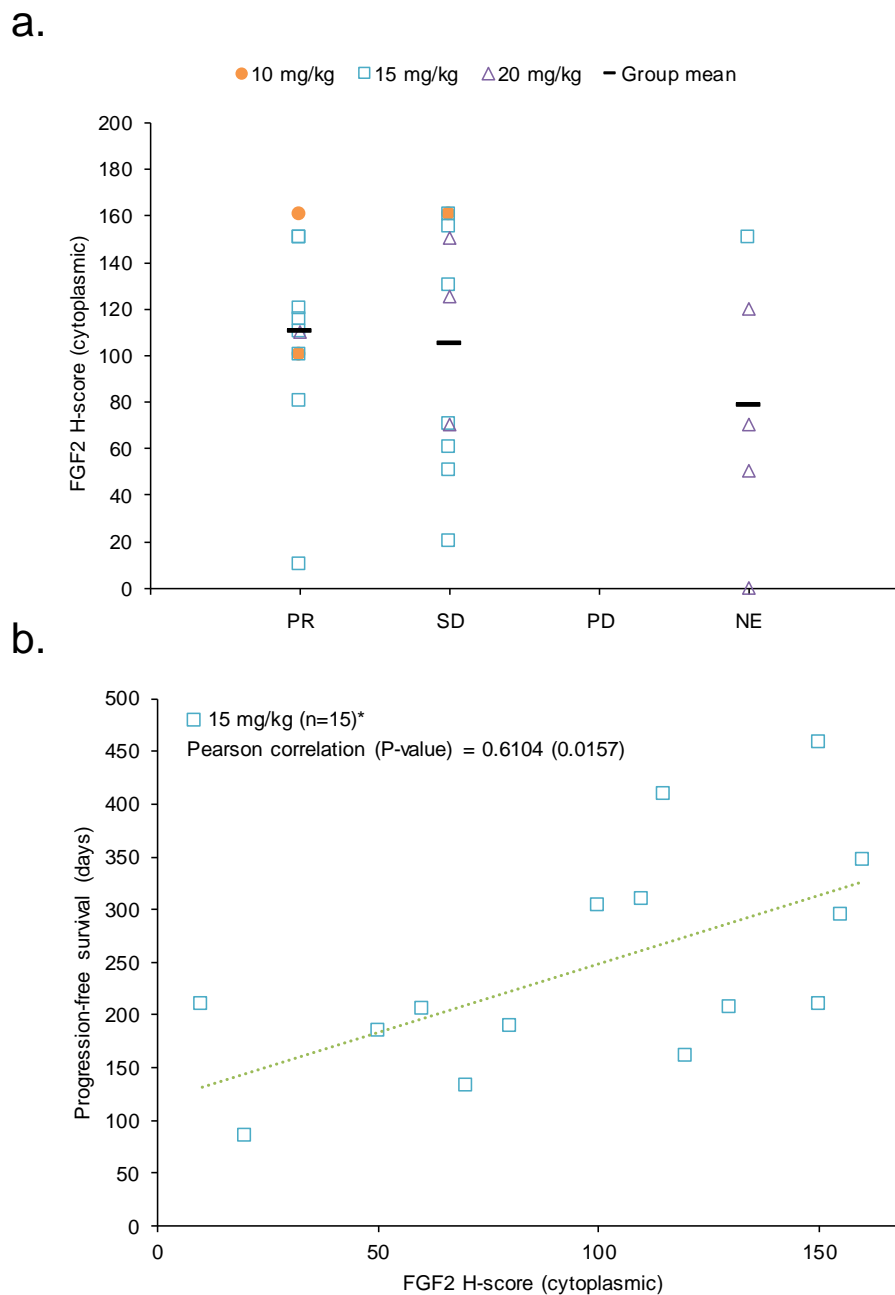

**Online Resource 4.** Comparison of FGF2 IHC H-score with response rate and progression-free survival.

(a) FGF2 IHC H-score for cytoplasmic staining was compared against the best overall response for GSK3052230-treated patients where archival FFPE tumor tissue was available. No correlation between FGF expression and response was observed for cytoplasmic or nuclear (not shown) FGF2 H-score. PR: partial response; SD: stable disease; PD: progressive disease; NE: not evaluable. (b) Duration of progression-free survival correlated positively with increasing expression levels of cytoplasmic FGF2 expression in 15 mg/kg GSK3052230-treated patients where archival FFPE tumor tissue was available. No correlation was observed in these samples when comparing nuclear FGF2 H-score with PFS or when comparing all dose cohorts FGF2 expression (cytoplasmic or nuclear) with PFS (data not shown).
